# Supplementary material for: The Forgotten Agenda of Wasting in Southeast Asia: Burden, Determinants and Overlap with Stunting: A Review of Nationally Representative Cross-Sectional Demographic and Health Surveys in Six Countries
Source: MDPI journal article supplement (doi:10.3390/nu12020559), 2020-02-20
Supplement: s1 [file s1]

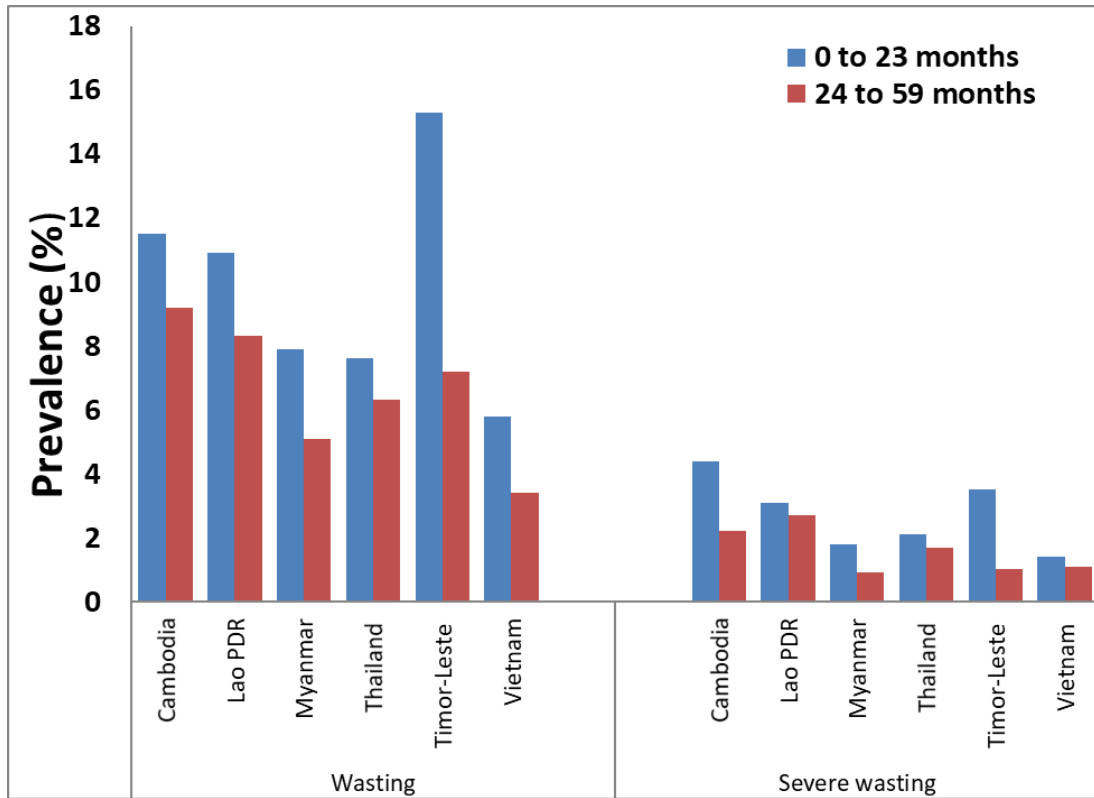

Figure S1: Prevalence of wasting and severe wasting among children 0 to 23 months and 24 to 59 months.

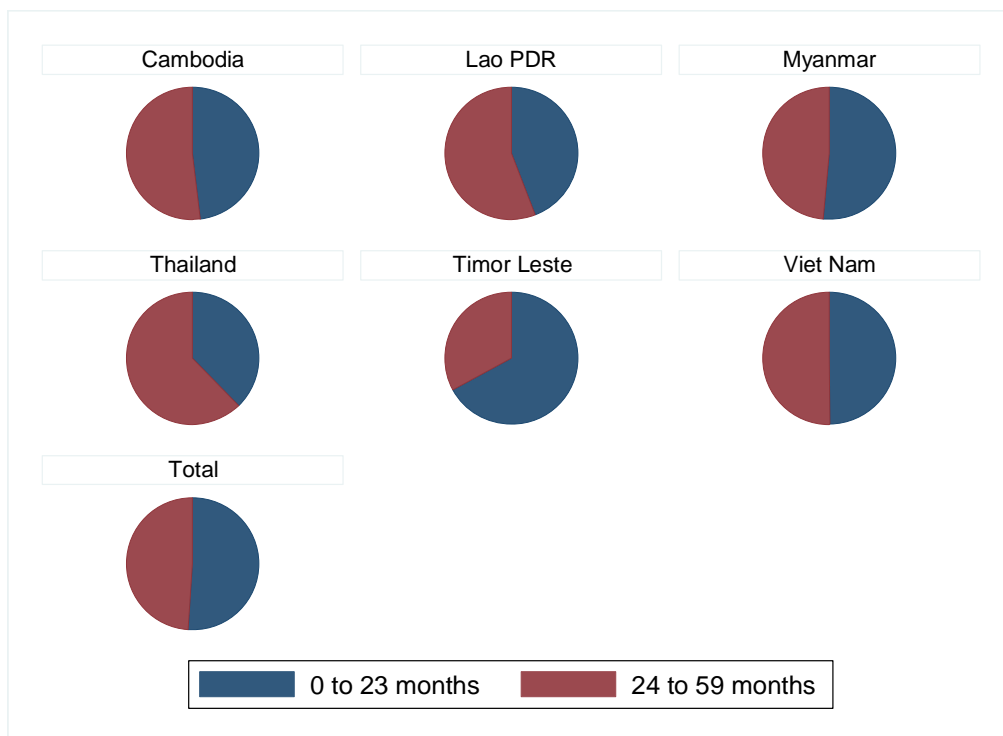

Figure S2. Contribution of the 0 to 23 months and the 24 to 59 months age groups to wasting caseload.

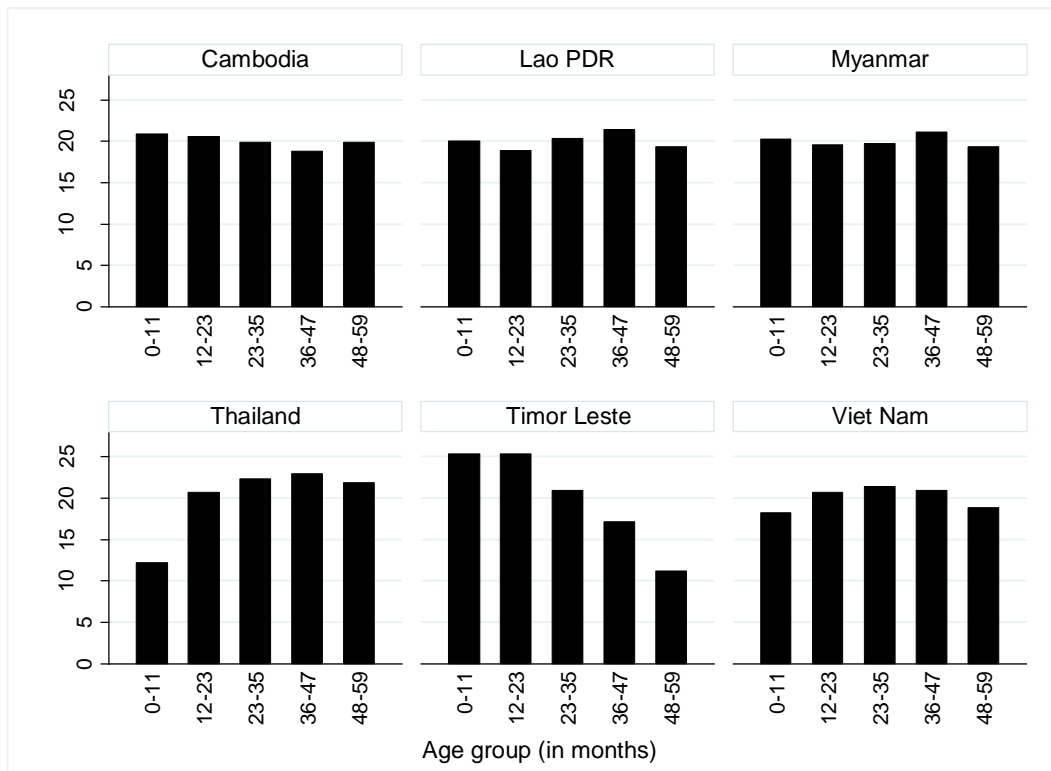

**Figure S3.** Distribution of the burden of wasting and concurrence across age group 12-months interval by country.
